# Supplementary material for: Interactions between sympatric invasive European fire ants (Myrmica rubra) and blacklegged ticks (Ixodes scapularis)
Source: PLoS One. 2021 May 10;16(5):e0251497. doi: 10.1371/journal.pone.0251497 (PMC8109827; doi:10.1371/journal.pone.0251497)
Supplement: S1 Data — (CSV) [file pone.0251497.s001.csv]

Date	Nest	Species	Life.Stage	Antennation	Threat	Biting	Carrying	Stinging	Score
12/03/18	1	I. scapularis	adult	9	2	2	1	0	8
12/03/18	1	D. variabilis	adult	14	6	11	6	7	61
12/05/18	2	I. scapularis	nymph	1	0	0	0	0	0
12/05/18	2	I. scapularis	adult	6	1	0	0	0	1
12/06/18	2	D. variabilis	adult	49	9	1	0	0	11
12/10/18	1	I. scapularis	larva	9	0	0	0	0	0
12/12/18	2	I. scapularis	larva	6	0	0	0	0	0
12/12/21	2	I. scapularis	nymph	3	0	0	0	0	0
12/14/18	1	I. scapularis	larva	5	0	0	0	0	0
12/14/18	1	I. scapularis	nymph	1	0	0	0	0	0
12/17/18	2	I. scapularis	adult	32	0	0	0	0	0
12/17/18	2	D. variabilis	adult	19	2	1	0	0	4
12/19/18	1	I. scapularis	adult	30	2	3	0	3	17
12/19/18	1	I. scapularis	nymph	5	0	0	0	0	0
12/19/18	1	I. scapularis	larva	15	0	0	0	0	0
12/19/18	1	D. variabilis	adult	38	4	2	1	1	13
12/21/18	2	I. scapularis	larva	17	0	0	0	0	0
12/21/18	2	D. variabilis	adult	35	6	1	0	0	8
12/21/18	2	I. scapularis	nymph	3	0	0	0	0	0
12/21/18	2	I. scapularis	adult	25	2	0	0	0	2
